# Supplementary material
Source: HighWire-hosted journal article supplement (https://cmaj.ca/highwire/filestream/76571/field_highwire_adjunct_files/3/191297-res-4-at.pdf)
Supplement: 191297-res-4-at.pdf [file 191297-res-4-at.pdf]

**Appendix 4 (as supplied by the authors):** Sensitivity analysis (SA), model performance evaluated at the top 5% cost threshold, by select risk score cut points, base scenario compared with three variants

| Scenario                                                                                        | Risk Percentile |       |       |
|-------------------------------------------------------------------------------------------------|-----------------|-------|-------|
|                                                                                                 | 90th            | 95th  | 99th  |
| <b>Sensitivity<sup>a</sup></b>                                                                  |                 |       |       |
| Base (exclude non-users/part-period eligible in baseline; include deaths in prospective period) | 0.464           | 0.311 | 0.098 |
| SA 1 (as Base but including non-users)                                                          | 0.390           | 0.234 | 0.064 |
| SA 2 (as Base but excluding prospective year deaths)                                            | 0.434           | 0.282 | 0.088 |
| <b>Specificity<sup>b</sup></b>                                                                  |                 |       |       |
| Base (exclude non-users/part-period eligible in baseline; include deaths in prospective period) | 0.919           | 0.964 | 0.995 |
| SA 1 (as Base but including non-users)                                                          | 0.932           | 0.970 | 0.996 |
| SA 2 (as Base but excluding prospective year deaths)                                            | 0.918           | 0.962 | 0.994 |
| <b>Positive Predictive Value<sup>c</sup></b>                                                    |                 |       |       |
| Base (exclude non-users/part-period eligible in baseline; include deaths in prospective period) | 0.232           | 0.311 | 0.491 |
| SA 1 (as Base but including non-users)                                                          | 0.390           | 0.468 | 0.636 |
| SA 2 (as Base but excluding prospective year deaths)                                            | 0.217           | 0.282 | 0.442 |
| <b>Accuracy<sup>d</sup></b>                                                                     |                 |       |       |
| Base (exclude non-users/part-period eligible in baseline; include deaths in prospective period) | 0.896           | 0.931 | 0.950 |
| SA 1 (as Base but including non-users)                                                          | 0.878           | 0.897 | 0.903 |
| SA 2 (as Base but excluding prospective year deaths)                                            | 0.893           | 0.928 | 0.949 |

Note: TP=true positives, TN=true negatives, FP=false positives, FN=false negatives

<sup>a</sup> Sensitivity: Percentage high cost cases predicted correctly (TP/(TP+FN))

<sup>b</sup> Specificity: Percentage of lower cost cases predicted correctly (TN/(TN+FP))

<sup>c</sup> Positive predictive value: Percentage of predicted high cost cases that were high cost (TP/(TP+FP))

<sup>d</sup> Accuracy: Percentage of all cases predicted correctly, high and lower cost ((TP+TN)/(TP+FP+TN+FN))
